# Supplementary material for: Is Exercise during Pregnancy a Risk for Gestational Age and Preterm Delivery? Systematic Review and Meta-Analysis
Source: MDPI journal article supplement (doi:10.3390/jcm12154915), 2023-07-26
Supplement: s1 [file s1]

| Author                | Selection bias | Performance bias | Detection bias | Attrition bias | Reporting bias |
|-----------------------|----------------|------------------|----------------|----------------|----------------|
| Babbar et al.         | +              | +                | +              | +              | +              |
| Bacchi et al.         | +              | +                | +              | +              | +              |
| Backhausen et al.     | +              | -                | +              | +              | +              |
| Barakat 2010 et añ    | +              | ?                | ?              | ?              | ?              |
| Barakat 2011 et al.   | +              | +                | -              | +              | +              |
| Barakat 2012 a et al. | +              | +                | +              | +              | +              |
| Barakat 2012 b et al. | +              | +                | +              | +              | +              |
| Barakat 2013 et al.   | +              | -                | +              | +              | +              |
| Barakat 2014 a et al. | +              | ?                | ?              | +              | +              |
| Barakat 2014b et al.  | +              | ?                | -              | +              | +              |
| Barakat 2016 et al.   | +              | +                | +              | +              | +              |
| Barakat 2018a et al.  | +              | +                | +              | +              | +              |
| Barakat 2018b et al.  | +              | +                | +              | +              | +              |
| Barakat 2018c et al.  | +              | +                | +              | +              | +              |
| Bhartia et al.        | ?              | +                | +              | +              | -              |

| Author                   | Selection bias | Performance bias | Detection bias | Attrition bias | Reporting bias | Other |
|--------------------------|----------------|------------------|----------------|----------------|----------------|-------|
| Bjontegaard et al.       | +              | +                | +              | +              | ?              | ?     |
| Brik et al.              | +              | +                | +              | ?              | ?              | ?     |
| Carrascosa et al.        | +              | +                | +              | +              | ?              | ?     |
| Clark et al.             | +              | +                | +              | +              | ?              | ?     |
| Cordero et al.           | +              | +                | +              | +              | +              | +     |
| Cordero et al.           | +              | +                | +              | +              | +              | +     |
| Da Silva et al.          | +              | +                | +              | +              | +              | +     |
| Daly et al.              | +              | +                | +              | +              | +              | ?     |
| Dias et al.              | +              | +                | +              | +              | +              | ?     |
| Ellingsen et al.         | +              | +                | +              | +              | +              | +     |
| Fernandez-Buhigas et al. | +              | +                | +              | ?              | +              | +     |
| Garnæs et al.            | +              | +                | +              | +              | +              | +     |
| Gueffé et al.            | +              | +                | +              | +              | +              | +     |
| Haakstad et al.          | +              | +                | +              | +              | +              | +     |
| Halse et al.             | +              | +                | +              | +              | +              | +     |

[illegible]

|                  | Sanda et al. | Seneviratne et al. | Silva-José et al. | Sobhgol et al. | Stafne et al. | Taniguchi et al. | Tomic et al. | Uria-Minguito et al. | Ussher et al. | Nobles et al. | Vinter et al. | Wang et al. | Yekefallah et al. |
|------------------|--------------|--------------------|-------------------|----------------|---------------|------------------|--------------|----------------------|---------------|---------------|---------------|-------------|-------------------|
| Selection bias   | +            | +                  | +                 | +              | +             | +                | +            | +                    | +             | +             | +             | +           | +                 |
| Performance bias | ?            | +                  | +                 | +              | +             | ?                | +            | +                    | ?             | +             | -             | +           | +                 |
| Detection bias   | +            | +                  | +                 | ?              | +             | ?                | +            | +                    | +             | +             | +             | -           | ?                 |
| Attrition bias   | +            | +                  | +                 | +              | +             | +                | +            | +                    | +             | +             | +             | +           | -                 |
| Reporting bias   | ?            | +                  | +                 | +              | +             | ?                | -            | +                    | ?             | +             | ?             | ?           | -                 |
